# Supplementary material for: One-step synthesis of three-dimensional graphene/multiwalled carbon nanotubes/Pd composite hydrogels: an efficient recyclable catalyst for Suzuki coupling reactions
Source: Royal Society of Chemistry journal article supplement (doi:10.1039/c5ta00280j), 2015-01-01
Supplement: c5ta00280j1.pdf [file c5ta00280j1.pdf]

Supporting information

**One-step synthesis of three-dimensional graphene/ multiwalled  
carbon nanotube/Pd composite hydrogel: an efficient recyclable  
catalyst for Suzuki coupling reactions**

Hui-qing Song <sup>a</sup>, Qian Zhu <sup>a</sup>, Xue-jing Zheng <sup>a</sup>, Xing-guo Chen <sup>a,b,\*</sup>

*<sup>a</sup> State Key Laboratory of Applied Organic Chemistry, College of Chemistry and  
Chemical Engineering, Lanzhou University, Lanzhou, Gansu 730000, China*

*<sup>b</sup> Key Laboratory of Nonferrous Metal Chemistry and Resources Utilization of Gansu  
Province, Lanzhou University, Lanzhou, Gansu 730000, China*

\* Corresponding author

E-mail address: [chenxg@lzu.edu.cn](mailto:chenxg@lzu.edu.cn)

Tel: 86-931-8912763

Fax: 86-931-8912582

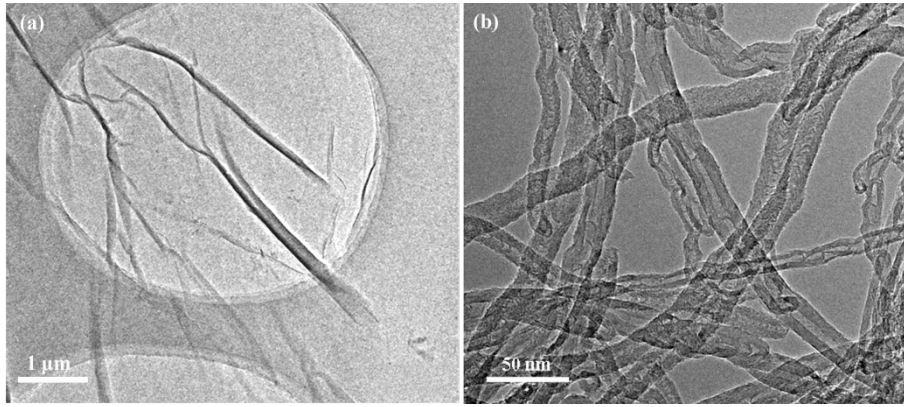

**Fig. S1** TEM images of the as-prepared GO (a) and MWCNTs (b).

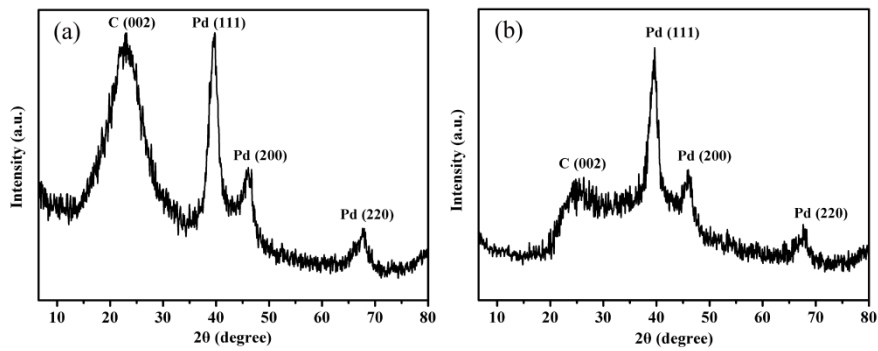

**Fig. S2** XRD patterns of the rGO/Pd (a) and MWCNTs/Pd (b) composites.

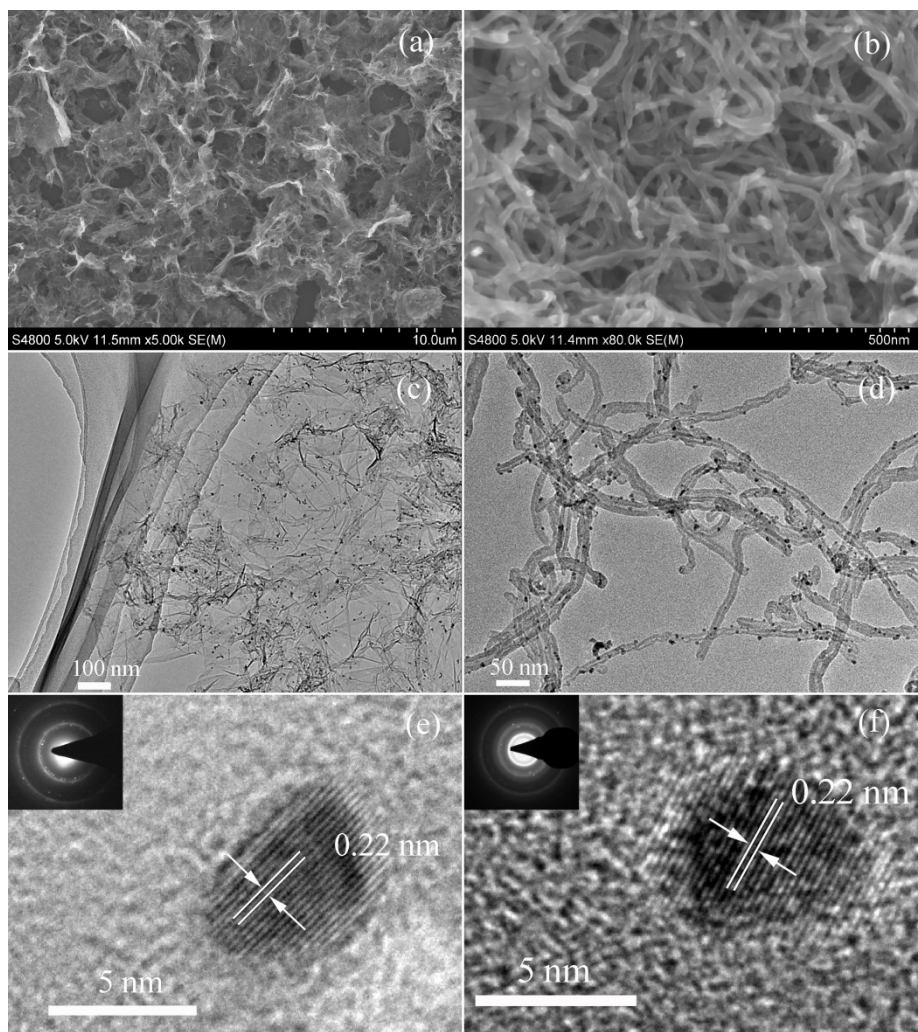

**Fig. S3** SEM images of (a) rGO/Pd and (b) MWCNTs/Pd. TEM images of (c) rGO/Pd and (d) MWCNTs/Pd. Representative HRTEM images of (e) rGO/Pd and (f) MWCNTs/Pd. Inset shows the corresponding SAED pattern.

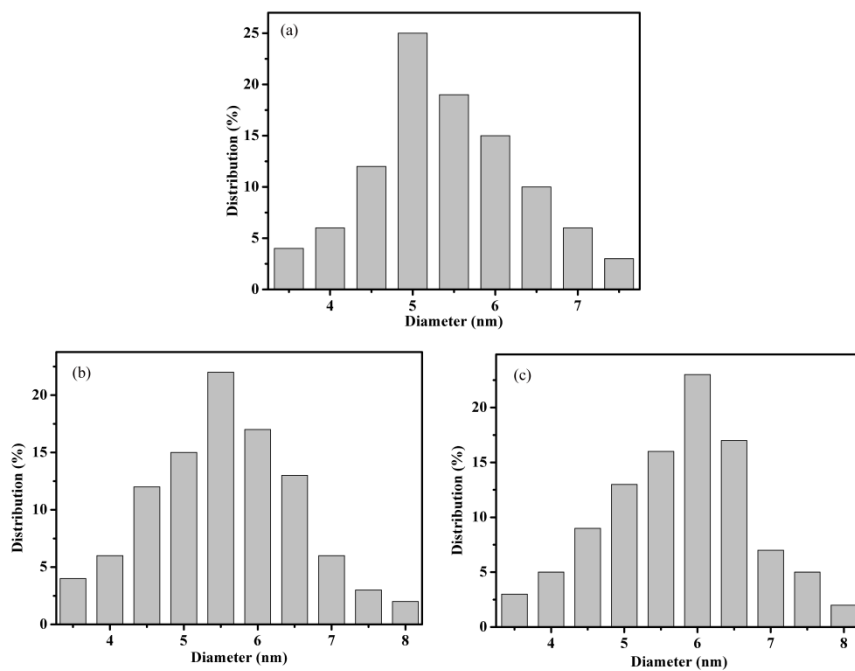

**Fig. S4** The size distribution of Pd NPs on (a) G/MWCNTs/Pd, (b) rGO/Pd and (c) MWCNTs/Pd.

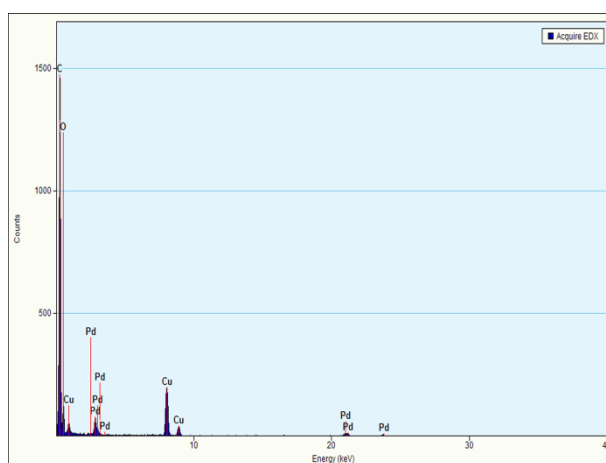

**Fig. S5** The EDX pattern of the G/MWCNTs/Pd composites.

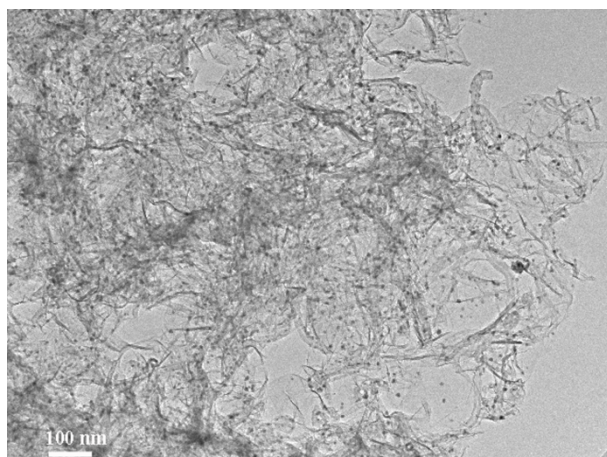

**Fig. S6** TEM image of the G/MWCNTs/Pd composites after six runs of recycling experiments.

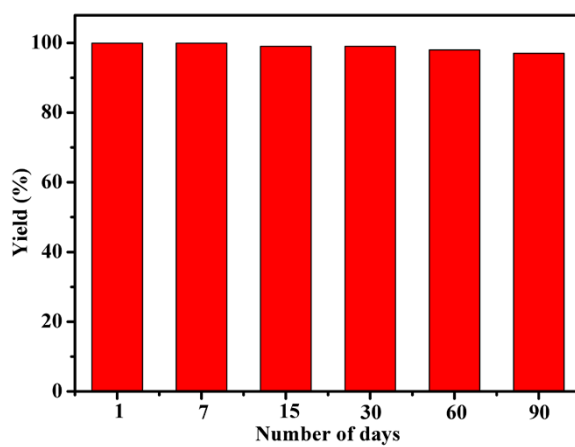

**Fig. S7** Stability of the G/MWCNTs/Pd catalyst for the Suzuki cross-coupling reaction of iodobenzene with phenylboronic acid in three months.

**Table S1** Performance of different supported Pd catalysts for the reaction of aryl halide with phenylboronic acid

| Aryl halide         | Catalyst              | Yield (%) (Time/h) | Yield (%) (Time/h)<br>this work | Ref. |
|---------------------|-----------------------|--------------------|---------------------------------|------|
| iodobenzene         | NHC-Pd/GO-IL          | 98 (2.5)           | >99 (1/4)                       | 54   |
|                     | Pd NPs-HNG            | 98 (2.5)           | >99 (1/4)                       | 55   |
| bromobenzene        | Pd NPs-HNG            | 94 (2.5)           | 95 (1)                          | 55   |
|                     | Pd <sub>np</sub> @MNP | 97 (4)             | 95 (1)                          | 56   |
| 4-nitrobromobenzene | Pd <sub>np</sub> @MNP | 99 (3)             | 98 (1)                          | 56   |
|                     | Pd-Ni(20)/RGO         | 68.6 (24)          | 98 (1)                          | 57   |
